# Supplementary material for: SARS-CoV-2 spike E156G/Δ157-158 mutations contribute to increased infectivity and immune escape
Source: Life Sci Alliance. 2022 Mar 16;5(7):e202201415. doi: 10.26508/lsa.202201415 (PMC8927725; doi:10.26508/lsa.202201415)
Supplement: Supplementary file 3 [file LSA-2022-01415_Supplemental_Data_1.xlsx]

## Sheet: Antibody List
		Sr. No.	Structure (PDBid)	Antibody	Source	Strain	Reference
1		1	7L2F	5-24	SARS-CoV2 infected patient	Wuhan	Cerutti, G. et al. Potent SARS-CoV-2 neutralizing antibodies directed against spike N-terminal domain target a single supersite. Cell Host Microbe 29, 819-833.e7 (2021).
1		2	7C2L	4A8	Convalescent donor	Wuhan	Chi, X. et al. A neutralizing human antibody binds to the N-terminal domain of the Spike protein of SARS-CoV-2. Science (80-. ). 369, 650–655 (2020).
		3	7LQW	2-17	SARS-CoV2 infected patient	Wuhan	Cerutti, G. et al. Potent SARS-CoV-2 neutralizing antibodies directed against spike N-terminal domain target a single supersite. Cell Host Microbe 29, 819-833.e7 (2021).
		4	7CWS	FC05	Convalescent donor	Wuhan	Wang, N. et al. Structure-based development of human antibody cocktails against SARS-CoV-2. Cell Res. 2020 311 31, 101–103 (2020).
		5	7L2C	2-51	SARS-CoV2 infected patient	Wuhan	Cerutti, G. et al. Potent SARS-CoV-2 neutralizing antibodies directed against spike N-terminal domain target a single supersite. Cell Host Microbe 29, 819-833.e7 (2021).
		6	7L2D	1-87	SARS-CoV2 infected patient	Wuhan	Cerutti, G. et al. Potent SARS-CoV-2 neutralizing antibodies directed against spike N-terminal domain target a single supersite. Cell Host Microbe 29, 819-833.e7 (2021).
		7	7L2E	4-18	SARS-CoV2 infected patient	Wuhan	Cerutti, G. et al. Potent SARS-CoV-2 neutralizing antibodies directed against spike N-terminal domain target a single supersite. Cell Host Microbe 29, 819-833.e7 (2021).
		8	7LXY	S2X333	SARS-CoV-2 recovered individuals	Wuhan	McCallum, M. et al. N-terminal domain antigenic mapping reveals a site of vulnerability for SARS-CoV-2. Cell 184, 2332-2347.e16 (2021).
		9	7LY2	S2M28	SARS-CoV-2 recovered individuals	Wuhan	McCallum, M. et al. N-terminal domain antigenic mapping reveals a site of vulnerability for SARS-CoV-2. Cell 184, 2332-2347.e16 (2021).
		10	7LXZ	S2L28	SARS-CoV-2 recovered individuals	Wuhan	McCallum, M. et al. N-terminal domain antigenic mapping reveals a site of vulnerability for SARS-CoV-2. Cell 184, 2332-2347.e16 (2021).
		11	7N8I	S2L20	SARS-CoV-2 recovered individuals	B.1.429 Epsilon Variant	McCallum, M. et al. SARS-CoV-2 immune evasion by the B. 1.427/B. 1.429 variant of concern. Science (80-. ). 373, 648–654 (2021).
		12	7RW2	5-7	SARS-CoV2 infected patient	Wuhan	Cerutti, G. et al. Neutralizing antibody 5-7 defines a distinct site of vulnerability in SARS-CoV-2 spike N-terminal domain. Cell Rep. 37, 109928 (2021).
		13	7DZY	2490	COVID-19 patient	Wuhan	Liu, Y. et al. An infectivity-enhancing site on the SARS-CoV-2 spike protein targeted by antibodies. Cell 184, 3452-3466.e18 (2021).
		14	7E8F	N9	Recovered or vaccinated individual	Wuhan	Cao, Y. et al. Humoral immune response to circulating SARS-CoV-2 variants elicited by inactivated and RBD-subunit vaccines. Cell Res. 2021 317 31, 732–741 (2021).
		15	7E7X	N11	Recovered or vaccinated individual	Wuhan	Cao, Y. et al. Humoral immune response to circulating SARS-CoV-2 variants elicited by inactivated and RBD-subunit vaccines. Cell Res. 2021 317 31, 732–741 (2021).
		16	7E8C	368-2	Recovered or vaccinated individual	Wuhan	Cao, Y. et al. Humoral immune response to circulating SARS-CoV-2 variants elicited by inactivated and RBD-subunit vaccines. Cell Res. 2021 317 31, 732–741 (2021).
		17	7LQV	4-8	SARS-CoV2 infected patient	Wuhan	Cerutti, G. et al. Potent SARS-CoV-2 neutralizing antibodies directed against spike N-terminal domain target a single supersite. Cell Host Microbe 29, 819-833.e7 (2021).

## Sheet: Interactions
	PDB-id	Residue	Residue Number	Chain on spike	residue on antibody	residue number on antibody	antibody chain
	7C2L	VAL	143	A	PRO	106	H
	7C2L	TYR	144	A	GLU	31	H
	7C2L	TYR	144	A	THR	30	H
	7C2L	TYR	144	A	THR	28	H
	7C2L	TYR	145	A	ALA	101	H
	7C2L	TYR	145	A	TYR	111	H
	7C2L	TYR	145	A	THR	30	H
	7C2L	TYR	145	A	PHE	109	H
	7C2L	TYR	145	A	PRO	53	H
	7C2L	TYR	145	A	GLU	31	H
	7C2L	TYR	145	A	VAL	102	H
	7C2L	HIS	146	A	THR	30	H
	7C2L	HIS	146	A	GLU	31	H
	7C2L	LYS	147	A	MET	34	H
	7C2L	LYS	147	A	SER	33	H
	7C2L	LYS	147	A	LEU	29	H
	7C2L	LYS	147	A	THR	30	H
	7C2L	LYS	147	A	PHE	51	H
	7C2L	LYS	147	A	ALA	101	H
	7C2L	LYS	147	A	GLU	72	H
	7C2L	LYS	147	A	PRO	53	H
	7C2L	LYS	147	A	LEU	32	H
	7C2L	LYS	147	A	GLU	31	H
	7C2L	LYS	147	A	GLY	56	H
	7C2L	ASN	148	A	GLY	56	H
	7C2L	ASN	148	A	THR	30	H
	7C2L	ASN	148	A	PHE	51	H
	7C2L	LYS	150	A	ASP	55	H
	7C2L	LYS	150	A	GLU	54	H
	7C2L	LYS	150	A	TYR	111	H
	7C2L	LYS	150	A	PRO	53	H
	7C2L	LYS	150	A	GLY	56	H
	7C2L	TRP	152	A	THR	105	H
	7C2L	TRP	152	A	PHE	109	H
	7C2L	TRP	152	A	GLY	104	H
	7C2L	TRP	152	A	VAL	102	H
	7C2L	TRP	152	A	PRO	106	H
	7C2L	ARG	158	A	THR	28	H
	7C2L	HIS	245	A	PRO	106	H
	7C2L	HIS	245	A	THR	105	H
	7C2L	ARG	246	A	PRO	106	H
	7C2L	ARG	246	A	GLU	31	H
	7C2L	ARG	246	A	TYR	27	H
	7C2L	ARG	246	A	THR	28	H
	7C2L	ARG	246	A	GLY	26	H
	7C2L	ARG	246	A	THR	105	H
	7C2L	ARG	246	A	GLY	104	H
	7C2L	SER	247	A	GLY	104	H
	7C2L	SER	247	A	TYR	27	H
	7C2L	TYR	248	A	THR	100	H
	7C2L	TYR	248	A	THR	105	H
	7C2L	TYR	248	A	GLY	104	H
	7C2L	TYR	248	A	TYR	27	H
	7C2L	TYR	248	A	VAL	102	H
	7C2L	TYR	248	A	ALA	103	H
	7C2L	TYR	248	A	GLU	31	H
	7C2L	LEU	249	A	GLY	104	H
	7C2L	LEU	249	A	ALA	103	H
	7C2L	LEU	249	A	PHE	60	L
	7C2L	LEU	249	A	VAL	102	H
	7C2L	LEU	249	A	THR	100	H
	7C2L	LEU	249	A	TYR	54	L
	7C2L	LEU	249	A	TYR	112	H
	7C2L	LEU	249	A	ASP	116	H
	7C2L	THR	250	A	GLY	104	H
	7C2L	PRO	251	A	SER	61	L
	7C2L	SER	256	A	GLU	1	H
	7C2L	GLY	257	A	GLU	1	H
	7cws	TYR	144	O	GLU	32	N
	7cws	TYR	144	O	THR	29	N
	7cws	TYR	144	O	PRO	31	N
	7cws	TYR	145	O	PRO	102	N
	7cws	TYR	145	O	VAL	33	N
	7cws	TYR	145	O	GLU	32	N
	7cws	TYR	145	O	PRO	31	N
	7cws	TYR	145	O	PHE	103	N
	7cws	HIS	146	O	PRO	31	N
	7cws	HIS	146	O	GLU	32	N
	7cws	LYS	147	O	PHE	52	N
	7cws	LYS	147	O	PRO	102	N
	7cws	LYS	147	O	GLU	32	N
	7cws	LYS	147	O	ALA	34	N
	7cws	LYS	147	O	PRO	31	N
	7cws	LYS	147	O	VAL	33	N
	7cws	LYS	147	O	MET	35	N
	7cws	LYS	147	O	GLU	73	N
	7cws	LYS	150	O	PHE	103	N
	7cws	LYS	150	O	PRO	54	N
	7cws	TRP	152	O	PHE	103	N
	7cws	ARG	246	O	GLY	27	N
	7cws	ARG	246	O	GLU	32	N
	7cws	ARG	246	O	TYR	28	N
	7cws	ARG	246	O	THR	29	N
	7cws	SER	247	O	GLU	1	N
	7cws	SER	247	O	TYR	28	N
	7cws	TYR	248	O	GLU	32	N
	7cws	TYR	248	O	THR	101	N
	7cws	TYR	248	O	TYR	28	N
	7cws	TYR	248	O	GLU	1	N
	7cws	TYR	248	O	ASP	110	N
	7cws	TYR	248	O	VAL	33	N
	7cws	LEU	249	O	PRO	56	K
	7cws	LEU	249	O	PRO	111	N
	7cws	LEU	249	O	ASP	110	N
	7cws	LEU	249	O	TRP	108	N
	7cws	LEU	249	O	TYR	50	K
	7cws	LEU	249	O	SER	57	K
	7cws	LEU	249	O	GLU	1	N
	7cws	LEU	249	O	LEU	47	K
	7cws	THR	250	O	SER	57	K
	7cws	THR	250	O	TYR	50	K
	7cws	THR	250	O	GLU	1	N
	7cws	PRO	251	O	TYR	50	K
	7cws	PRO	251	O	ARG	55	K
	7cws	SER	256	O	GLU	1	N
	7cws	SER	256	O	GLY	27	N
	7cws	SER	256	O	TYR	28	N
	7cws	SER	256	O	VAL	2	N
	7cws	GLY	257	O	TYR	28	N
	7cws	GLY	257	O	GLU	1	N
	7dzy	VAL	70	A	ASP	54	O
	7dzy	SER	71	A	SER	30	O
	7dzy	SER	71	A	SER	31	O
	7dzy	GLY	72	A	SER	30	O
	7dzy	GLY	72	A	SER	31	O
	7dzy	THR	73	A	SER	31	O
	7dzy	GLY	181	A	GLU	57	O
	7dzy	GLY	181	A	GLY	56	O
	7dzy	LYS	182	A	GLU	57	O
	7dzy	LYS	182	A	GLY	56	O
	7dzy	GLN	183	A	GLU	57	O
	7dzy	GLN	183	A	LYS	58	O
	7dzy	ASN	185	A	TRP	94	P
	7dzy	ASN	211	A	GLU	1	P
	7dzy	LEU	212	A	TRP	94	P
	7dzy	LEU	212	A	GLU	1	P
	7dzy	VAL	213	A	ASN	93	P
	7dzy	VAL	213	A	TRP	94	P
	7dzy	VAL	213	A	GLU	1	P
	7dzy	VAL	213	A	ASN	92	P
	7dzy	ARG	214	A	SER	28	P
	7dzy	TRP	258	A	ASP	54	O
	7e7x	TYR	144	A	GLU	31	H
	7e7x	TYR	144	A	ILE	30	H
	7e7x	TYR	144	A	THR	28	H
	7e7x	TYR	145	A	ALA	103	H
	7e7x	TYR	145	A	ALA	101	H
	7e7x	TYR	145	A	ILE	102	H
	7e7x	TYR	145	A	GLU	31	H
	7e7x	TYR	145	A	ILE	30	H
	7e7x	HIS	146	A	ILE	30	H
	7e7x	HIS	146	A	GLU	31	H
	7e7x	LYS	147	A	GLY	56	H
	7e7x	LYS	147	A	LEU	29	H
	7e7x	LYS	147	A	SER	33	H
	7e7x	LYS	147	A	ALA	101	H
	7e7x	LYS	147	A	ILE	30	H
	7e7x	LYS	147	A	GLU	72	H
	7e7x	LYS	147	A	PHE	51	H
	7e7x	LYS	147	A	ILE	32	H
	7e7x	LYS	147	A	GLU	31	H
	7e7x	LYS	147	A	ILE	34	H
	7e7x	ASN	148	A	PHE	51	H
	7e7x	ASN	148	A	ILE	30	H
	7e7x	ASN	148	A	GLY	56	H
	7e7x	LYS	150	A	GLU	54	H
	7e7x	LYS	150	A	ASP	52	H
	7e7x	LYS	150	A	GLY	56	H
	7e7x	LYS	150	A	ALA	101	H
	7e7x	LYS	150	A	PRO	53	H
	7e7x	LYS	150	A	ALA	55	H
	7e7x	LYS	150	A	ALA	103	H
	7e7x	TRP	152	A	ILE	102	H
	7e7x	ARG	246	A	THR	28	H
	7e7x	ARG	246	A	TYR	27	H
	7e7x	ARG	246	A	GLY	26	H
	7e7x	ARG	246	A	GLU	31	H
	7e7x	SER	247	A	TYR	27	H
	7e7x	SER	247	A	ILE	102	H
	7e7x	TYR	248	A	TYR	27	H
	7e7x	TYR	248	A	ALA	101	H
	7e7x	TYR	248	A	PRO	100	H
	7e7x	TYR	248	A	GLU	31	H
	7e7x	TYR	248	A	ASP	111	H
	7e7x	TYR	248	A	TRP	109	H
	7e7x	TYR	248	A	SER	33	H
	7e7x	TYR	248	A	GLY	99	H
	7e7x	TYR	248	A	ILE	102	H
	7e7x	TYR	248	A	THR	98	H
	7e7x	TYR	248	A	ILE	32	H
	7e7x	LEU	249	A	THR	107	H
	7e7x	LEU	249	A	TRP	109	H
	7e7x	LEU	249	A	ILE	102	H
	7e7x	LEU	249	A	ALA	105	H
	7e7x	LEU	249	A	PRO	100	H
	7e7x	LEU	249	A	TYR	51	L
	7e7x	THR	250	A	TYR	51	L
	7e7x	THR	250	A	TRP	109	H
	7e7x	PRO	251	A	TRP	109	H
	7e7x	PRO	251	A	PRO	57	L
	7e7x	PRO	251	A	TYR	51	L
	7e7x	PRO	251	A	ASP	111	H
	7e7x	PRO	251	A	LEU	48	L
	7e7x	GLY	252	A	SER	58	L
	7e7x	GLY	252	A	PRO	57	L
	7e7x	ASP	253	A	TYR	27	H
	7e7x	SER	254	A	TYR	27	H
	7e7x	SER	255	A	TYR	27	H
	7e7x	SER	255	A	GLY	26	H
	7e8c	GLN	14	A	SER	52	H
	7e8c	GLN	14	A	ASN	74	H
	7e8c	GLN	14	A	SER	54	H
	7e8c	GLN	14	A	HIS	103	H
	7e8c	GLN	14	A	ALA	102	H
	7e8c	GLN	14	A	SER	53	H
	7e8c	GLN	14	A	SER	30	H
	7e8c	GLN	14	A	SER	31	H
	7e8c	CYS	15	A	SER	31	H
	7e8c	CYS	15	A	SER	30	H
	7e8c	VAL	16	A	SER	31	H
	7e8c	TYR	144	A	GLN	49	L
	7e8c	TYR	144	A	THR	106	H
	7e8c	TYR	144	A	TYR	110	H
	7e8c	TYR	144	A	PHE	109	H
	7e8c	TYR	145	A	TYR	31	L
	7e8c	TYR	145	A	PHE	109	H
	7e8c	TYR	145	A	GLN	49	L
	7e8c	HIS	146	A	PHE	109	H
	7e8c	HIS	146	A	LYS	30	L
	7e8c	HIS	146	A	TYR	31	L
	7e8c	HIS	146	A	SER	108	H
	7e8c	HIS	146	A	ASP	29	L
	7e8c	LYS	147	A	GLY	28	L
	7e8c	LYS	147	A	ASP	50	L
	7e8c	LYS	147	A	GLN	49	L
	7e8c	LYS	147	A	LEU	27	L
	7e8c	LYS	147	A	TYR	31	L
	7e8c	LYS	147	A	LYS	30	L
	7e8c	LYS	147	A	ASP	29	L
	7e8c	LYS	147	A	ASN	65	L
	7e8c	ASN	148	A	ASP	29	L
	7e8c	ASN	148	A	TYR	31	L
	7e8c	LYS	150	A	TYR	31	L
	7e8c	GLU	154	A	PHE	109	H
	7e8c	GLU	154	A	SER	105	H
	7e8c	GLU	154	A	THR	106	H
	7e8c	SER	155	A	HIS	103	H
	7e8c	SER	155	A	SER	105	H
	7e8c	SER	155	A	THR	106	H
	7e8c	GLU	156	A	THR	106	H
	7e8c	GLU	156	A	ALA	102	H
	7e8c	GLU	156	A	TYR	110	H
	7e8c	GLU	156	A	GLY	101	H
	7e8c	GLU	156	A	HIS	103	H
	7e8c	GLU	156	A	GLY	100	H
	7e8c	PHE	157	A	ALA	102	H
	7e8c	PHE	157	A	HIS	103	H
	7e8c	ARG	158	A	SER	31	H
	7e8c	ARG	158	A	GLY	101	H
	7e8c	ARG	158	A	HIS	103	H
	7e8c	ARG	158	A	SER	53	H
	7e8c	ARG	158	A	TYR	110	H
	7e8c	ARG	158	A	GLY	100	H
	7e8c	ARG	158	A	ALA	102	H
	7e8c	SER	161	A	SER	54	H
	7e8c	ARG	246	A	LYS	52	L
	7e8c	ARG	246	A	TYR	110	H
	7e8c	ARG	246	A	GLY	100	H
	7e8c	SER	247	A	LYS	52	L
	7e8c	SER	247	A	TYR	48	L
	7e8c	TYR	248	A	SER	55	L
	7e8c	TYR	248	A	TYR	48	L
	7e8c	LEU	249	A	LEU	45	L
	7e8c	LEU	249	A	TYR	110	H
	7e8c	LEU	249	A	GLY	111	H
	7e8c	LEU	249	A	ASP	113	H
	7e8c	LEU	249	A	ASN	99	H
	7e8c	LEU	249	A	PRO	54	L
	7e8c	LEU	249	A	TYR	48	L
	7e8c	LEU	249	A	SER	55	L
	7e8c	THR	250	A	TYR	32	H
	7e8c	THR	250	A	ASP	113	H
	7e8c	THR	250	A	SER	55	L
	7e8c	PRO	251	A	ASP	113	H
	7e8c	PRO	251	A	TYR	32	H
	7e8c	PRO	251	A	PRO	54	L
	7e8c	PRO	251	A	THR	98	H
	7e8c	PRO	251	A	VAL	114	H
	7e8c	PRO	251	A	SER	55	L
	7e8c	GLY	252	A	VAL	114	H
	7e8c	GLY	252	A	VAL	2	H
	7e8c	GLY	252	A	TYR	32	H
	7e8c	GLY	252	A	ASP	113	H
	7e8c	ASP	253	A	TYR	32	H
	7e8c	ASP	253	A	THR	28	H
	7e8c	SER	254	A	SER	31	H
	7e8c	SER	254	A	THR	28	H
	7e8c	SER	254	A	TYR	32	H
	7e8c	TRP	258	A	TYR	110	H
	7e8f	GLN	14	A	SER	30	H
	7e8f	GLN	14	A	ALA	102	H
	7e8f	GLN	14	A	HIS	103	H
	7e8f	GLN	14	A	ASN	74	H
	7e8f	GLN	14	A	SER	31	H
	7e8f	GLN	14	A	SER	54	H
	7e8f	GLN	14	A	SER	53	H
	7e8f	CYS	15	A	SER	31	H
	7e8f	CYS	15	A	SER	30	H
	7e8f	VAL	16	A	SER	31	H
	7e8f	ASN	17	A	THR	28	H
	7e8f	TYR	144	A	TYR	110	H
	7e8f	TYR	144	A	GLN	49	L
	7e8f	TYR	144	A	PHE	109	H
	7e8f	TYR	144	A	THR	106	H
	7e8f	TYR	145	A	TYR	31	L
	7e8f	TYR	145	A	PHE	109	H
	7e8f	HIS	146	A	SER	108	H
	7e8f	HIS	146	A	ASP	29	L
	7e8f	HIS	146	A	TYR	31	L
	7e8f	HIS	146	A	LYS	30	L
	7e8f	HIS	146	A	PHE	109	H
	7e8f	LYS	147	A	ASP	29	L
	7e8f	LYS	147	A	ASN	65	L
	7e8f	LYS	147	A	ASP	50	L
	7e8f	LYS	147	A	GLY	28	L
	7e8f	LYS	147	A	LYS	30	L
	7e8f	LYS	147	A	LEU	27	L
	7e8f	LYS	147	A	TYR	31	L
	7e8f	ASN	148	A	ASP	29	L
	7e8f	LYS	150	A	TYR	31	L
	7e8f	GLU	154	A	THR	106	H
	7e8f	GLU	154	A	SER	105	H
	7e8f	GLU	154	A	PHE	109	H
	7e8f	SER	155	A	SER	105	H
	7e8f	GLU	156	A	TYR	110	H
	7e8f	GLU	156	A	ALA	102	H
	7e8f	GLU	156	A	GLY	100	H
	7e8f	GLU	156	A	HIS	103	H
	7e8f	GLU	156	A	THR	106	H
	7e8f	GLU	156	A	GLY	101	H
	7e8f	PHE	157	A	ALA	102	H
	7e8f	PHE	157	A	HIS	103	H
	7e8f	ARG	158	A	TYR	32	H
	7e8f	ARG	158	A	HIS	103	H
	7e8f	ARG	158	A	SER	53	H
	7e8f	ARG	158	A	GLY	100	H
	7e8f	ARG	158	A	SER	31	H
	7e8f	ARG	158	A	ALA	102	H
	7e8f	ARG	158	A	TYR	110	H
	7e8f	ARG	158	A	GLY	101	H
	7e8f	SER	161	A	SER	54	H
	7e8f	ARG	246	A	TYR	110	H
	7e8f	ARG	246	A	GLY	100	H
	7e8f	ARG	246	A	LYS	52	L
	7e8f	SER	247	A	TYR	48	L
	7e8f	SER	247	A	LYS	52	L
	7e8f	TYR	248	A	SER	55	L
	7e8f	TYR	248	A	LYS	52	L
	7e8f	TYR	248	A	TYR	48	L
	7e8f	LEU	249	A	PRO	54	L
	7e8f	LEU	249	A	SER	55	L
	7e8f	LEU	249	A	ASP	113	H
	7e8f	LEU	249	A	ARG	53	L
	7e8f	LEU	249	A	GLY	111	H
	7e8f	LEU	249	A	TYR	48	L
	7e8f	LEU	249	A	LEU	45	L
	7e8f	LEU	249	A	TYR	110	H
	7e8f	THR	250	A	TYR	32	H
	7e8f	THR	250	A	SER	55	L
	7e8f	THR	250	A	PRO	54	L
	7e8f	THR	250	A	ASP	113	H
	7e8f	PRO	251	A	ASP	113	H
	7e8f	PRO	251	A	SER	55	L
	7e8f	PRO	251	A	THR	98	H
	7e8f	PRO	251	A	PRO	54	L
	7e8f	PRO	251	A	TYR	32	H
	7e8f	PRO	251	A	VAL	114	H
	7e8f	GLY	252	A	ASP	113	H
	7e8f	GLY	252	A	VAL	2	H
	7e8f	GLY	252	A	TYR	32	H
	7e8f	GLY	252	A	VAL	114	H
	7e8f	ASP	253	A	TYR	32	H
	7e8f	ASP	253	A	THR	28	H
	7e8f	SER	254	A	THR	28	H
	7e8f	SER	254	A	SER	31	H
	7e8f	SER	254	A	TYR	32	H
	7e8f	TRP	258	A	TYR	110	H
	7l2c	GLN	14	A	THR	28	H
	7l2c	TYR	144	A	GLU	31	H
	7l2c	TYR	144	A	ILE	30	H
	7l2c	TYR	145	A	TYR	98	H
	7l2c	TYR	145	A	ALA	97	H
	7l2c	TYR	145	A	ILE	30	H
	7l2c	TYR	145	A	GLU	31	H
	7l2c	HIS	146	A	ILE	30	H
	7l2c	LYS	147	A	ALA	97	H
	7l2c	LYS	147	A	GLU	71	H
	7l2c	LYS	147	A	MET	34	H
	7l2c	LYS	147	A	LEU	32	H
	7l2c	LYS	147	A	VAL	55	H
	7l2c	LYS	147	A	PHE	51	H
	7l2c	LYS	147	A	ILE	30	H
	7l2c	LYS	147	A	LEU	29	H
	7l2c	LYS	147	A	GLU	31	H
	7l2c	LYS	147	A	SER	33	H
	7l2c	ASN	148	A	ILE	30	H
	7l2c	ASN	148	A	VAL	55	H
	7l2c	ASN	148	A	PHE	51	H
	7l2c	ASN	149	A	VAL	55	H
	7l2c	LYS	150	A	ASP	54	H
	7l2c	LYS	150	A	GLU	53	H
	7l2c	LYS	150	A	VAL	55	H
	7l2c	TRP	152	A	TYR	98	H
	7l2c	ARG	158	A	GLU	31	H
	7l2c	ARG	158	A	THR	28	H
	7l2c	ARG	246	A	TYR	27	H
	7l2c	ARG	246	A	GLY	26	H
	7l2c	ARG	246	A	THR	28	H
	7l2c	ARG	246	A	GLU	31	H
	7l2c	SER	247	A	TYR	27	H
	7l2c	TYR	248	A	GLU	31	H
	7l2c	TYR	248	A	TYR	98	H
	7l2c	TYR	248	A	TRP	96	H
	7l2c	TYR	248	A	TYR	27	H
	7l2c	LEU	249	A	TRP	96	H
	7l2c	LEU	249	A	TYR	27	H
	7l2c	LEU	249	A	GLN	1	H
	7l2c	LEU	249	A	TYR	102	H
	7l2c	THR	250	A	TRP	96	H
	7l2c	THR	250	A	GLN	1	H
	7l2c	THR	250	A	PRO	55	L
	7l2c	THR	250	A	SER	56	L
	7l2c	THR	250	A	TYR	102	H
	7l2c	THR	250	A	TYR	49	L
	7l2c	PRO	251	A	TYR	102	H
	7l2c	PRO	251	A	SER	56	L
	7l2c	PRO	251	A	LEU	46	L
	7l2c	PRO	251	A	GLN	1	H
	7l2c	PRO	251	A	GLY	101	H
	7l2c	PRO	251	A	PRO	55	L
	7l2c	GLY	252	A	PRO	55	L
	7l2c	GLY	252	A	SER	56	L
	7l2c	GLY	252	A	TYR	102	H
	7l2c	GLY	252	A	GLN	1	H
	7l2c	GLY	252	A	GLY	57	L
	7l2c	ASP	253	A	GLN	1	H
	7l2c	ASP	253	A	SER	56	L
	7l2c	SER	254	A	GLN	1	H
	7l2c	GLY	257	A	TYR	27	H
	7l2d	VAL	143	A	PRO	100	H
	7l2d	TYR	144	A	GLU	31	H
	7l2d	TYR	144	A	ILE	30	H
	7l2d	TYR	145	A	ILE	30	H
	7l2d	TYR	145	A	GLU	31	H
	7l2d	TYR	145	A	VAL	98	H
	7l2d	TYR	145	A	ALA	97	H
	7l2d	HIS	146	A	ILE	30	H
	7l2d	HIS	146	A	GLU	31	H
	7l2d	LYS	147	A	LEU	32	H
	7l2d	LYS	147	A	ILE	30	H
	7l2d	LYS	147	A	LEU	29	H
	7l2d	LYS	147	A	GLU	31	H
	7l2d	LYS	147	A	GLU	71	H
	7l2d	LYS	147	A	PHE	51	H
	7l2d	LYS	147	A	ALA	55	H
	7l2d	LYS	147	A	MET	34	H
	7l2d	LYS	147	A	ALA	97	H
	7l2d	LYS	147	A	SER	33	H
	7l2d	ASN	148	A	ILE	30	H
	7l2d	ASN	148	A	ALA	55	H
	7l2d	ASN	148	A	PHE	51	H
	7l2d	LYS	150	A	ASP	54	H
	7l2d	LYS	150	A	GLU	53	H
	7l2d	TRP	152	A	GLY	100	H
	7l2d	TRP	152	A	VAL	98	H
	7l2d	TRP	152	A	ILE	99	H
	7l2d	TRP	152	A	SER	100	H
	7l2d	TRP	152	A	PRO	100	H
	7l2d	ARG	158	A	THR	28	H
	7l2d	HIS	245	A	PRO	100	H
	7l2d	ARG	246	A	TYR	27	H
	7l2d	ARG	246	A	GLU	31	H
	7l2d	ARG	246	A	THR	28	H
	7l2d	ARG	246	A	GLY	26	H
	7l2d	SER	247	A	GLN	1	H
	7l2d	TYR	248	A	LEU	32	H
	7l2d	TYR	248	A	GLN	1	H
	7l2d	TYR	248	A	ILE	96	H
	7l2d	TYR	248	A	GLY	95	H
	7l2d	TYR	248	A	VAL	2	H
	7l2d	TYR	248	A	TYR	27	H
	7l2d	TYR	248	A	VAL	102	H
	7l2d	TYR	248	A	ASP	101	H
	7l2d	TYR	248	A	THR	94	H
	7l2d	LEU	249	A	GLY	100	H
	7l2d	LEU	249	A	ILE	99	H
	7l2d	LEU	249	A	VAL	98	H
	7l2d	LEU	249	A	ILE	96	H
	7l2d	THR	250	A	GLY	100	H
	7l2d	THR	250	A	ILE	96	H
	7l2d	THR	250	A	TYR	49	L
	7l2d	THR	250	A	ASP	101	H
	7l2d	THR	250	A	ILE	99	H
	7l2d	PRO	251	A	TYR	100	H
	7l2d	PRO	251	A	SER	56	L
	7l2d	PRO	251	A	ILE	99	H
	7l2d	PRO	251	A	LEU	46	L
	7l2d	PRO	251	A	TYR	49	L
	7l2d	PRO	251	A	PRO	55	L
	7l2d	PRO	251	A	ILE	96	H
	7l2d	PRO	251	A	ASP	101	H
	7l2d	GLY	252	A	LEU	46	L
	7l2d	GLY	252	A	TYR	100	H
	7l2d	GLY	252	A	SER	56	L
	7l2d	GLY	252	A	ILE	96	H
	7l2d	GLY	252	A	ASP	101	H
	7l2d	GLY	252	A	PRO	55	L
	7l2d	ASP	253	A	PRO	55	L
	7l2d	ASP	253	A	GLN	1	H
	7l2d	ASP	253	A	SER	56	L
	7l2d	ASP	253	A	ASP	101	H
	7l2d	SER	254	A	GLN	1	H
	7l2d	SER	254	A	VAL	2	H
	7l2d	SER	255	A	TYR	27	H
	7l2d	SER	255	A	GLN	1	H
	7l2d	SER	256	A	GLN	1	H
	7l2d	SER	256	A	TYR	27	H
	7l2d	SER	256	A	GLY	26	H
	7l2d	TRP	258	A	GLU	31	H
	7l2e	GLN	14	A	TYR	95	L
	7l2e	CYS	15	A	TYR	95	L
	7l2e	VAL	16	A	HIS	58	H
	7l2e	VAL	16	A	ASN	56	H
	7l2e	VAL	16	A	TYR	95	L
	7l2e	ASN	17	A	ASP	53	H
	7l2e	ASN	17	A	ASN	56	H
	7l2e	ASN	17	A	SER	55	H
	7l2e	LEU	18	A	SER	55	H
	7l2e	LEU	18	A	ASP	53	H
	7l2e	LEU	18	A	ASN	56	H
	7l2e	THR	19	A	ASP	53	H
	7l2e	PHE	140	A	TYR	100	H
	7l2e	GLY	142	A	TYR	100	H
	7l2e	VAL	143	A	TYR	100	H
	7l2e	TYR	144	A	TYR	100	H
	7l2e	TYR	144	A	TYR	100	H
	7l2e	TYR	144	A	GLN	31	L
	7l2e	TYR	144	A	ASN	93	L
	7l2e	TYR	145	A	TYR	100	H
	7l2e	TYR	145	A	TYR	32	L
	7l2e	HIS	146	A	LYS	30	L
	7l2e	HIS	146	A	TYR	32	L
	7l2e	LYS	147	A	GLY	68	L
	7l2e	LYS	147	A	ALA	33	L
	7l2e	LYS	147	A	TYR	32	L
	7l2e	LYS	147	A	LEU	28	L
	7l2e	LYS	147	A	ASP	51	L
	7l2e	LYS	147	A	SER	66	L
	7l2e	LYS	147	A	ALA	29	L
	7l2e	LYS	147	A	VAL	71	L
	7l2e	LYS	147	A	GLN	31	L
	7l2e	LYS	147	A	LYS	30	L
	7l2e	ASN	148	A	ALA	29	L
	7l2e	LYS	150	A	TYR	32	L
	7l2e	GLU	154	A	LYS	30	L
	7l2e	GLU	156	A	SER	94	L
	7l2e	GLU	156	A	GLY	95	L
	7l2e	GLU	156	A	ASN	93	L
	7l2e	GLU	156	A	TYR	100	H
	7l2e	ARG	158	A	ASN	93	L
	7l2e	ARG	158	A	TYR	95	L
	7l2e	ARG	158	A	GLY	95	L
	7l2e	ARG	158	A	TYR	100	H
	7l2e	LEU	244	A	TYR	100	H
	7l2e	HIS	245	A	TYR	98	H
	7l2e	HIS	245	A	ASN	99	H
	7l2e	HIS	245	A	TYR	100	H
	7l2e	ARG	246	A	TYR	98	H
	7l2e	ARG	246	A	ASN	99	H
	7l2e	ARG	246	A	TYR	100	H
	7l2e	SER	247	A	TYR	98	H
	7l2e	SER	247	A	ASP	95	H
	7l2e	SER	247	A	TYR	100	H
	7l2e	SER	247	A	GLY	97	H
	7l2e	SER	247	A	ASN	99	H
	7l2e	TYR	248	A	SER	52	H
	7l2e	TYR	248	A	TYR	100	H
	7l2e	TYR	248	A	ASN	56	H
	7l2e	TYR	248	A	HIS	58	H
	7l2e	TYR	248	A	TYR	95	L
	7l2e	TYR	248	A	ASP	53	H
	7l2e	LEU	249	A	HIS	58	H
	7l2e	LEU	249	A	ASP	95	H
	7l2e	LEU	249	A	ILE	51	H
	7l2e	LEU	249	A	TYR	32	H
	7l2e	LEU	249	A	MET	34	H
	7l2e	LEU	249	A	VAL	50	H
	7l2e	LEU	249	A	TRP	96	L
	7l2e	LEU	249	A	SER	52	H
	7l2e	LEU	249	A	HIS	35	H
	7l2e	LEU	249	A	GLY	33	H
	7l2e	LEU	249	A	ASN	56	H
	7l2e	THR	250	A	SER	31	H
	7l2e	THR	250	A	GLY	97	H
	7l2e	THR	250	A	ASP	95	H
	7l2e	THR	250	A	SER	96	H
	7l2e	THR	250	A	TYR	98	H
	7l2e	THR	250	A	TYR	32	H
	7l2e	THR	250	A	GLY	33	H
	7l2e	PRO	251	A	TYR	98	H
	7l2e	PRO	251	A	TYR	32	H
	7l2e	PRO	251	A	SER	31	H
	7l2e	PRO	251	A	SER	30	H
	7l2e	PRO	251	A	GLY	33	H
	7l2e	GLY	252	A	TYR	98	H
	7l2e	GLY	252	A	SER	31	H
	7l2e	ASP	253	A	SER	31	H
	7l2e	ASP	253	A	TYR	98	H
	7l2e	SER	256	A	ASN	99	H
	7l2e	SER	256	A	TYR	98	H
	7l2f	GLN	14	A	ASP	98	H
	7l2f	GLN	14	A	TYR	32	H
	7l2f	GLN	14	A	SER	31	H
	7l2f	GLN	14	A	THR	28	H
	7l2f	GLN	14	A	LEU	27	H
	7l2f	GLN	14	A	SER	30	H
	7l2f	CYS	15	A	THR	28	H
	7l2f	CYS	15	A	TYR	32	H
	7l2f	VAL	16	A	TYR	32	H
	7l2f	TYR	144	A	ASP	98	H
	7l2f	TYR	144	A	TYR	100	H
	7l2f	TYR	145	A	SER	100	H
	7l2f	TYR	145	A	TYR	100	H
	7l2f	HIS	146	A	SER	100	H
	7l2f	HIS	146	A	TYR	100	H
	7l2f	LYS	147	A	TYR	100	H
	7l2f	LYS	147	A	SER	100	H
	7l2f	ASN	148	A	TYR	100	H
	7l2f	LYS	150	A	TYR	100	H
	7l2f	GLU	154	A	TYR	100	H
	7l2f	GLU	154	A	TYR	99	H
	7l2f	SER	155	A	TYR	100	H
	7l2f	GLU	156	A	TYR	100	H
	7l2f	ARG	158	A	ASP	98	H
	7l2f	ARG	158	A	TYR	100	H
	7l2f	ARG	158	A	SER	31	H
	7l2f	ARG	158	A	TYR	32	H
	7l2f	SER	161	A	LEU	27	H
	7l2f	ARG	246	A	TYR	100	H
	7l2f	ARG	246	A	ASP	98	H
	7l2f	ARG	246	A	TYR	100	H
	7l2f	SER	247	A	TYR	100	H
	7l2f	TYR	248	A	TYR	100	H
	7l2f	TYR	248	A	TYR	100	H
	7l2f	TYR	248	A	SER	100	H
	7l2f	TYR	248	A	TYR	100	H
	7l2f	TYR	248	A	TYR	100	H
	7l2f	LEU	249	A	TYR	100	H
	7l2f	LEU	249	A	SER	53	L
	7l2f	LEU	249	A	TYR	100	H
	7l2f	LEU	249	A	TYR	100	H
	7l2f	LEU	249	A	TYR	49	L
	7l2f	THR	250	A	TYR	100	H
	7l2f	THR	250	A	TYR	49	L
	7l2f	PRO	251	A	TYR	49	L
	7l2f	PRO	251	A	TYR	100	H
	7l2f	PRO	251	A	PRO	96	H
	7l2f	GLY	252	A	TYR	100	H
	7l2f	GLY	252	A	TYR	32	H
	7l2f	GLY	252	A	PRO	96	H
	7l2f	ASP	253	A	TYR	32	H
	7l2f	ASP	253	A	PRO	96	H
	7l2f	ASP	253	A	THR	28	H
	7l2f	ASP	253	A	ARG	94	H
	7l2f	SER	254	A	THR	56	L
	7l2f	SER	256	A	THR	56	L
	7lqv	GLN	14	A	THR	28	H
	7lqv	GLN	14	A	ILE	53	H
	7lqv	GLN	14	A	SER	30	H
	7lqv	GLN	14	A	SER	31	H
	7lqv	CYS	15	A	SER	31	H
	7lqv	GLY	142	A	TYR	100	H
	7lqv	TYR	144	A	GLN	96	H
	7lqv	TYR	144	A	TYR	100	H
	7lqv	HIS	146	A	GLN	50	L
	7lqv	HIS	146	A	TYR	32	L
	7lqv	HIS	146	A	LYS	100	H
	7lqv	LYS	147	A	LYS	53	L
	7lqv	LYS	147	A	TYR	49	L
	7lqv	LYS	147	A	ASP	51	L
	7lqv	LYS	147	A	GLN	50	L
	7lqv	LYS	147	A	LYS	100	H
	7lqv	LYS	147	A	TYR	32	L
	7lqv	ASN	148	A	LYS	53	L
	7lqv	ASN	149	A	TYR	32	L
	7lqv	ASN	149	A	ASP	51	L
	7lqv	SER	151	A	TYR	32	L
	7lqv	TRP	152	A	LYS	100	H
	7lqv	TRP	152	A	TYR	32	L
	7lqv	GLU	154	A	ILE	100	H
	7lqv	GLU	154	A	TYR	100	H
	7lqv	GLU	154	A	ASP	99	H
	7lqv	GLU	154	A	THR	97	H
	7lqv	SER	155	A	ASP	99	H
	7lqv	SER	155	A	ILE	100	H
	7lqv	GLU	156	A	SER	31	H
	7lqv	GLU	156	A	GLN	96	H
	7lqv	GLU	156	A	ASP	99	H
	7lqv	GLU	156	A	THR	97	H
	7lqv	GLU	156	A	VAL	98	H
	7lqv	GLU	156	A	TYR	100	H
	7lqv	PHE	157	A	ASP	99	H
	7lqv	ARG	158	A	HIS	32	H
	7lqv	ARG	158	A	SER	31	H
	7lqv	ARG	158	A	GLN	96	H
	7lqv	SER	161	A	ILE	53	H
	7lqv	SER	161	A	LYS	73	H
	7lqv	ARG	246	A	GLN	96	H
	7lqv	SER	247	A	SER	56	L
	7lqv	TYR	248	A	SER	56	L
	7lqv	LEU	249	A	ASP	101	H
	7lqv	LEU	249	A	SER	56	L
	7lqv	LEU	249	A	GLN	96	H
	7lqv	LEU	249	A	GLN	1	H
	7lqv	THR	250	A	GLN	1	H
	7lqv	PRO	251	A	GLN	1	H
	7lqv	GLY	252	A	GLN	1	H
	7lqv	ASP	253	A	GLN	1	H
	7lqv	ASP	253	A	GLN	96	H
	7lqv	ASP	253	A	HIS	32	H
	7lqv	ASP	253	A	VAL	2	H
	7lqw	GLN	14	C	ASN	92	L
	7lqw	CYS	15	C	PRO	95	L
	7lqw	ASN	17	C	THR	56	H
	7lqw	ASN	17	C	ASN	58	H
	7lqw	ASN	17	C	ILE	52	H
	7lqw	ASN	17	C	GLY	55	H
	7lqw	LEU	18	C	PHE	54	H
	7lqw	LEU	18	C	GLY	55	H
	7lqw	LEU	18	C	THR	56	H
	7lqw	THR	19	C	THR	56	H
	7lqw	THR	20	C	THR	56	H
	7lqw	THR	20	C	GLY	55	H
	7lqw	THR	76	C	PHE	54	H
	7lqw	LYS	77	C	PHE	54	H
	7lqw	ARG	78	C	PHE	54	H
	7lqw	PHE	79	C	PHE	54	H
	7lxy	GLN	14	A	SER	92	L
	7lxy	GLN	14	A	GLY	93	L
	7lxy	GLN	14	A	ASP	95	L
	7lxy	VAL	16	A	ASN	57	H
	7lxy	ASN	17	A	SER	56	H
	7lxy	ASN	17	A	ASN	57	H
	7lxy	GLY	142	A	TRP	106	H
	7lxy	VAL	143	A	TRP	106	H
	7lxy	TYR	144	A	SER	103	H
	7lxy	TYR	144	A	SER	104	H
	7lxy	TYR	144	A	SER	105	H
	7lxy	TYR	144	A	TRP	106	H
	7lxy	TYR	145	A	SER	103	H
	7lxy	TYR	145	A	SER	104	H
	7lxy	HIS	146	A	SER	103	H
	7lxy	HIS	146	A	SER	104	H
	7lxy	LYS	147	A	SER	103	H
	7lxy	LYS	147	A	SER	104	H
	7lxy	ASN	148	A	SER	103	H
	7lxy	GLU	156	A	SER	92	L
	7lxy	GLU	156	A	SER	104	H
	7lxy	GLU	156	A	SER	105	H
	7lxy	GLU	156	A	TRP	106	H
	7lxy	GLU	156	A	SER	107	H
	7lxy	GLU	156	A	GLY	108	H
	7lxy	ARG	158	A	SER	92	L
	7lxy	ARG	158	A	ASP	95	L
	7lxy	ARG	158	A	TRP	106	H
	7lxy	ARG	246	A	TRP	106	H
	7lxz	THR	19	A	SER	54	H
	7lxz	TYR	144	A	TRP	105	H
	7lxz	TYR	144	A	LEU	106	H
	7lxz	HIS	146	A	LEU	106	H
	7lxz	GLU	156	A	TRP	105	H
	7lxz	ARG	158	A	TRP	105	H
	7lxz	ARG	246	A	TRP	105	H
	7lxz	SER	247	A	TYR	103	H
	7lxz	SER	247	A	TRP	105	H
	7lxz	TYR	248	A	TYR	103	H
	7lxz	TYR	248	A	TRP	105	H
	7lxz	LEU	249	A	TYR	103	H
	7lxz	THR	250	A	TRP	105	H
	7lxz	THR	250	A	TYR	103	H
	7lxz	THR	250	A	ALA	102	H
	7lxz	PRO	251	A	ASP	31	H
	7lxz	PRO	251	A	TRP	105	H
	7lxz	PRO	251	A	TYR	103	H
	7lxz	PRO	251	A	ALA	102	H
	7lxz	GLY	252	A	ASP	31	H
	7lxz	GLY	252	A	TRP	105	H
	7lxz	GLY	252	A	SER	53	H
	7lxz	GLY	252	A	ASN	101	H
	7lxz	GLY	252	A	TYR	103	H
	7lxz	GLY	252	A	ALA	102	H
	7lxz	GLY	252	A	LYS	104	H
	7lxz	GLY	252	A	SER	30	H
	7lxz	GLY	252	A	TYR	32	H
	7lxz	ASP	253	A	ASP	31	H
	7lxz	ASP	253	A	LYS	104	H
	7lxz	ASP	253	A	ASN	56	H
	7lxz	ASP	253	A	TRP	105	H
	7lxz	ASP	253	A	ALA	102	H
	7lxz	ASP	253	A	SER	53	H
	7lxz	ASP	253	A	TYR	57	H
	7lxz	ASP	253	A	SER	54	H
	7lxz	ASP	253	A	SER	55	H
	7lxz	ASP	253	A	SER	52	H
	7lxz	SER	254	A	LYS	104	H
	7lxz	SER	254	A	TRP	105	H
	7lxz	SER	255	A	ASN	56	H
	7lxz	SER	255	A	SER	54	H
	7lxz	SER	256	A	SER	54	H
	7lxz	SER	256	A	SER	53	H
	7lxz	SER	256	A	SER	30	H
	7lxz	GLY	257	A	TRP	105	H
	7ly2	VAL	16	A	ASN	57	H
	7ly2	ASN	17	A	SER	56	H
	7ly2	ASN	17	A	ASN	57	H
	7ly2	VAL	143	A	SER	92	L
	7ly2	TYR	144	A	LYS	29	L
	7ly2	TYR	144	A	SER	92	L
	7ly2	TYR	145	A	LYS	29	L
	7ly2	HIS	146	A	ALA	28	L
	7ly2	HIS	146	A	LYS	29	L
	7ly2	LYS	147	A	ALA	28	L
	7ly2	LYS	147	A	HIS	30	L
	7ly2	LYS	147	A	LYS	29	L
	7ly2	ASN	148	A	LYS	29	L
	7ly2	ASN	148	A	GLY	67	L
	7ly2	ASN	148	A	ALA	28	L
	7ly2	ASN	149	A	ALA	28	L
	7ly2	SER	155	A	SER	92	L
	7ly2	SER	155	A	ILE	93	L
	7ly2	GLU	156	A	ILE	93	L
	7ly2	ARG	158	A	SER	95	L
	7ly2	ARG	158	A	ILE	93	L
	7ly2	ARG	246	A	SER	92	L
	7ly2	SER	247	A	GLY	102	H
	7ly2	LEU	249	A	GLY	94	L
	7ly2	LEU	249	A	ILE	93	L
	7ly2	LEU	249	A	SER	92	L
	7ly2	THR	250	A	GLY	102	H
	7ly2	THR	250	A	GLU	103	H
	7ly2	THR	250	A	VAL	100	H
	7ly2	THR	250	A	TRP	104	H
	7ly2	PRO	251	A	GLU	103	H
	7ly2	PRO	251	A	TYR	32	H
	7ly2	PRO	251	A	SER	31	H
	7ly2	PRO	251	A	MET	34	H
	7ly2	PRO	251	A	ASP	54	H
	7ly2	PRO	251	A	TYR	53	H
	7ly2	PRO	251	A	ALA	99	H
	7ly2	PRO	251	A	TRP	52	H
	7ly2	PRO	251	A	ILE	51	H
	7ly2	PRO	251	A	GLY	33	H
	7ly2	PRO	251	A	VAL	50	H
	7ly2	GLY	252	A	ALA	101	H
	7ly2	GLY	252	A	GLY	33	H
	7ly2	GLY	252	A	SER	31	H
	7ly2	GLY	252	A	ALA	99	H
	7ly2	GLY	252	A	TYR	53	H
	7ly2	GLY	252	A	TYR	32	H
	7ly2	ASP	253	A	TYR	32	H
	7ly2	ASP	253	A	ALA	101	H
	7ly2	ASP	253	A	GLY	33	H
	7ly2	ASP	253	A	SER	30	H
	7ly2	ASP	253	A	SER	31	H
	7ly2	ASP	253	A	TYR	53	H
	7ly2	SER	254	A	SER	31	H
	7ly2	SER	254	A	GLY	102	H
	7ly2	SER	254	A	ALA	101	H
	7ly2	SER	255	A	GLY	102	H
	7n8i	TYR	28	A	ASN	30	H
	7n8i	TYR	28	A	THR	28	H
	7n8i	TYR	28	A	PHE	29	H
	7n8i	TYR	28	A	PHE	27	H
	7n8i	ASN	61	A	ASN	30	H
	7n8i	THR	63	A	ASN	30	H
	7n8i	THR	63	A	SER	31	H
	7n8i	THR	63	A	THR	28	H
	7n8i	PHE	65	A	THR	28	H
	7n8i	PRO	82	A	TYR	109	H
	7n8i	VAL	83	A	TYR	32	H
	7n8i	VAL	83	A	TYR	109	H
	7n8i	VAL	83	A	TYR	108	H
	7n8i	LEU	84	A	GLY	106	H
	7n8i	LEU	84	A	TYR	32	H
	7n8i	LEU	84	A	TYR	108	H
	7n8i	PRO	85	A	SER	107	H
	7n8i	PRO	85	A	GLY	106	H
	7n8i	PRO	85	A	SER	31	H
	7n8i	PRO	85	A	SER	105	H
	7n8i	PRO	85	A	TYR	32	H
	7n8i	PHE	86	A	GLY	106	H
	7n8i	ASN	87	A	SER	105	H
	7n8i	ASN	87	A	ASN	30	H
	7n8i	ASN	87	A	SER	31	H
	7n8i	ASN	87	A	ARG	52	H
	7n8i	ASN	87	A	TYR	53	H
	7n8i	ASN	87	A	TYR	32	H
	7n8i	ASP	88	A	ARG	52	H
	7n8i	ASP	88	A	TYR	53	H
	7n8i	ASP	88	A	ASP	54	H
	7n8i	GLY	89	A	TYR	53	H
	7n8i	THR	108	A	SER	102	H
	7n8i	THR	108	A	TYR	32	L
	7n8i	THR	109	A	TYR	108	H
	7n8i	THR	109	A	PHE	31	L
	7n8i	THR	109	A	SER	102	H
	7n8i	THR	109	A	ASP	50	L
	7n8i	THR	109	A	ASN	53	L
	7n8i	THR	109	A	TYR	32	L
	7n8i	LEU	110	A	TYR	108	H
	7n8i	ASP	111	A	ASN	53	L
	7n8i	ASP	111	A	ASP	50	L
	7n8i	LYS	113	A	PHE	31	L
	7n8i	LYS	113	A	ARG	30	L
	7n8i	LYS	113	A	ALA	51	L
	7n8i	LYS	113	A	ASP	50	L
	7n8i	LYS	113	A	SER	52	L
	7n8i	LYS	113	A	ASN	53	L
	7n8i	THR	114	A	TYR	32	L
	7n8i	THR	114	A	ARG	30	L
	7n8i	THR	114	A	PHE	31	L
	7n8i	ASN	234	A	ARG	103	H
	7n8i	THR	236	A	ARG	103	H
	7n8i	THR	236	A	TYR	104	H
	7n8i	THR	236	A	SER	105	H
	7n8i	THR	236	A	GLY	106	H
	7n8i	THR	236	A	SER	102	H
	7n8i	THR	236	A	ASP	101	H
	7n8i	ARG	237	A	ASP	101	H
	7n8i	ARG	237	A	GLY	106	H
	7n8i	ARG	237	A	SER	107	H
	7n8i	ARG	237	A	TYR	108	H
	7n8i	ARG	237	A	SER	102	H
	7n8i	ARG	237	A	LYS	100	H
	7n8i	ARG	237	A	ASP	50	L
	7n8i	TYR	269	A	TYR	53	H
	7n8i	TYR	269	A	ASN	30	H
	7n8i	TYR	269	A	SER	31	H
	7n8i	LEU	270	A	TYR	53	H
	7n8i	GLN	271	A	TYR	53	H
	7n8i	GLN	271	A	ASP	54	H
	7n8i	PRO	272	A	TYR	53	H
	7n8i	PRO	272	A	ASP	54	H
	7rw2	ILE	101	A	TRP	100	H
	7rw2	ARG	102	A	TRP	100	H
	7rw2	GLY	103	A	TRP	100	H
	7rw2	TRP	104	A	TRP	100	H
	7rw2	ILE	119	A	TRP	100	H
	7rw2	VAL	120	A	TRP	100	H
	7rw2	ASN	121	A	TRP	100	H
	7rw2	THR	124	A	TYR	94	L
	7rw2	VAL	126	A	SER	100	H
	7rw2	VAL	126	A	TRP	100	H
	7rw2	SER	151	A	GLY	55	H
	7rw2	TRP	152	A	SER	56	H
	7rw2	TYR	170	A	TYR	100	H
	7rw2	SER	172	A	SER	100	H
	7rw2	GLN	173	A	TYR	100	H
	7rw2	GLN	173	A	ASN	92	L
	7rw2	GLN	173	A	LEU	91	L
	7rw2	GLN	173	A	SER	100	H
	7rw2	GLN	173	A	TYR	32	L
	7rw2	PRO	174	A	TYR	94	L
	7rw2	PRO	174	A	ASN	92	L
	7rw2	PRO	174	A	THR	93	L
	7rw2	PHE	175	A	SER	100	H
	7rw2	PHE	175	A	TYR	33	H
	7rw2	PHE	175	A	TYR	94	L
	7rw2	LEU	176	A	ASN	52	H
	7rw2	LEU	176	A	VAL	50	H
	7rw2	LEU	176	A	SER	56	H
	7rw2	LEU	176	A	TYR	94	L
	7rw2	LEU	176	A	THR	57	H
	7rw2	LEU	176	A	TYR	33	H
	7rw2	LEU	176	A	ILE	51	H
	7rw2	LEU	176	A	SER	58	H
	7rw2	MET	177	A	GLY	55	H
	7rw2	MET	177	A	TYR	33	H
	7rw2	MET	177	A	ASN	52	H
	7rw2	MET	177	A	GLY	54	H
	7rw2	MET	177	A	SER	56	H
	7rw2	ASP	178	A	GLY	54	H
	7rw2	ASP	178	A	SER	53	H
	7rw2	ASP	178	A	SER	56	H
	7rw2	ASP	178	A	ASN	52	H
	7rw2	LEU	179	A	SER	56	H
	7rw2	LEU	179	A	GLY	54	H
	7rw2	GLU	180	A	SER	53	H
	7rw2	GLU	180	A	GLY	54	H
	7rw2	GLU	180	A	ARG	71	H
	7rw2	ASN	188	A	SER	100	H
	7rw2	ARG	190	A	SER	100	H
	7rw2	ARG	190	A	TRP	100	H
	7rw2	ARG	190	A	GLY	100	H
	7rw2	PHE	192	A	TRP	100	H
	7rw2	SER	205	A	LYS	100	H
	7rw2	LYS	206	A	LYS	100	H
	7rw2	HIS	207	A	SER	100	H
	7rw2	HIS	207	A	GLY	100	H
	7rw2	GLU	224	A	LYS	100	H
	7rw2	PRO	225	A	LYS	100	H
	7rw2	LEU	226	A	LYS	100	H
	7rw2	LEU	226	A	TRP	100	H

## Sheet: Cumulative interactions
	Residue on NTD	No. of interactions
	1	0
	2	0
	3	0
	4	0
	5	0
	6	0
	7	0
	8	0
	9	0
	10	0
	11	0
	12	0
	13	0
	14	31
	15	9
	16	8
	17	12
	18	6
	19	3
	20	2
	21	0
	22	0
	23	0
	24	0
	25	0
	26	0
	27	0
	28	4
	29	0
	30	0
	31	0
	32	0
	33	0
	34	0
	35	0
	36	0
	37	0
	38	0
	39	0
	40	0
	41	0
	42	0
	43	0
	44	0
	45	0
	46	0
	47	0
	48	0
	49	0
	50	0
	51	0
	52	0
	53	0
	54	0
	55	0
	56	0
	57	0
	58	0
	59	0
	60	0
	61	1
	62	0
	63	3
	64	0
	65	1
	66	0
	67	0
	68	0
	69	0
	70	1
	71	2
	72	2
	73	1
	74	0
	75	0
	76	1
	77	1
	78	1
	79	1
	80	0
	81	0
	82	1
	83	3
	84	3
	85	5
	86	1
	87	6
	88	3
	89	1
	90	0
	91	0
	92	0
	93	0
	94	0
	95	0
	96	0
	97	0
	98	0
	99	0
	100	0
	101	1
	102	1
	103	1
	104	1
	105	0
	106	0
	107	0
	108	2
	109	6
	110	1
	111	2
	112	0
	113	6
	114	3
	115	0
	116	0
	117	0
	118	0
	119	1
	120	1
	121	1
	122	0
	123	0
	124	1
	125	0
	126	2
	127	0
	128	0
	129	0
	130	0
	131	0
	132	0
	133	0
	134	0
	135	0
	136	0
	137	0
	138	0
	139	0
	140	1
	141	0
	142	3
	143	5
	144	37
	145	37
	146	31
	147	87
	148	22
	149	4
	150	23
	151	2
	152	16
	153	0
	154	13
	155	9
	156	31
	157	5
	158	36
	159	0
	160	0
	161	5
	162	0
	163	0
	164	0
	165	0
	166	0
	167	0
	168	0
	169	0
	170	1
	171	0
	172	1
	173	5
	174	3
	175	3
	176	8
	177	5
	178	4
	179	2
	180	3
	181	2
	182	2
	183	2
	184	0
	185	1
	186	0
	187	0
	188	1
	189	0
	190	3
	191	0
	192	1
	193	0
	194	0
	195	0
	196	0
	197	0
	198	0
	199	0
	200	0
	201	0
	202	0
	203	0
	204	0
	205	1
	206	1
	207	2
	208	0
	209	0
	210	0
	211	1
	212	2
	213	4
	214	1
	215	0
	216	0
	217	0
	218	0
	219	0
	220	0
	221	0
	222	0
	223	0
	224	1
	225	1
	226	2
	227	0
	228	0
	229	0
	230	0
	231	0
	232	0
	233	0
	234	1
	235	0
	236	6
	237	7
	238	0
	239	0
	240	0
	241	0
	242	0
	243	0
	244	1
	245	6
	246	39
	247	22
	248	56
	249	70
	250	41
	251	58
	252	42
	253	37
	254	16
	255	7
	256	14
	257	5
	258	4
	259	0
	260	0
	261	0
	262	0
	263	0
	264	0
	265	0
	266	0
	267	0
	268	0
	269	3
	270	1
	271	2
	272	2
	273	0
	274	0
	275	0
	276	0
	277	0
	278	0
	279	0
	280	0
	281	0
	282	0
	283	0
	284	0
	285	0
	286	0
	287	0
	288	0
	289	0
	290	0
	291	0
	292	0
	293	0
	294	0
	295	0
	296	0
	297	0
	298	0
	299	0
	300	0
